# Supplementary material for: Towards centimeter thick transparent wood through interface manipulation
Source: Royal Society of Chemistry journal article supplement (doi:10.1039/c7ta09973h), 2017-12-14
Supplement: c7ta09973h1.pdf [file c7ta09973h1.pdf]

## **Towards centimeter thick transparent wood through interface manipulation**

Yuanyuan Li,<sup>a</sup> Xuan Yang,<sup>a</sup> Qiliang Fu,<sup>a</sup> Ramiro Rojas,<sup>a</sup> Min Yan,<sup>b\*</sup> Lars Berglund<sup>a\*</sup>

<sup>a</sup> Wallenberg Wood Science Center, Department of Fiber and Polymer Technology, KTH Royal Institute of Technology, SE-10044 Stockholm, Sweden

<sup>b</sup> School of Engineering Science, Department of Applied Physics, KTH Royal Institute of Technology, SE-16440 Kista, Sweden

Corresponding author: Min Yan, e-mail: [miya@kth.se](mailto:miya@kth.se)

Lars Berglund, e-mail: [blund@kth.se](mailto:blund@kth.se)

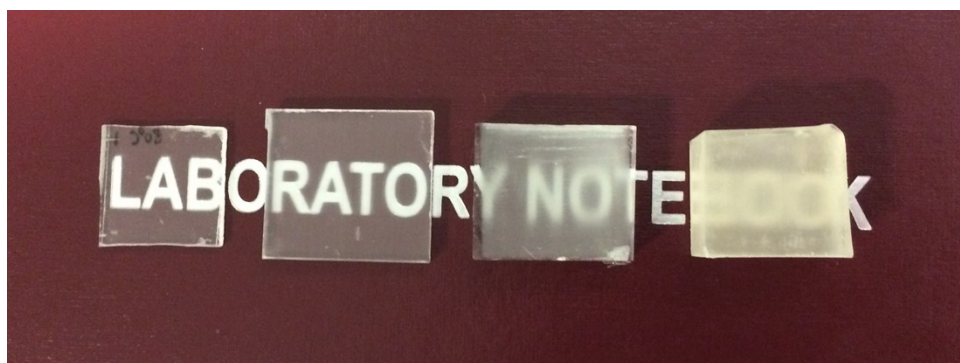

Figure S1 Photograph of acetylated transparent wood with thickness of 1.5, 3, 7, and 10 mm.

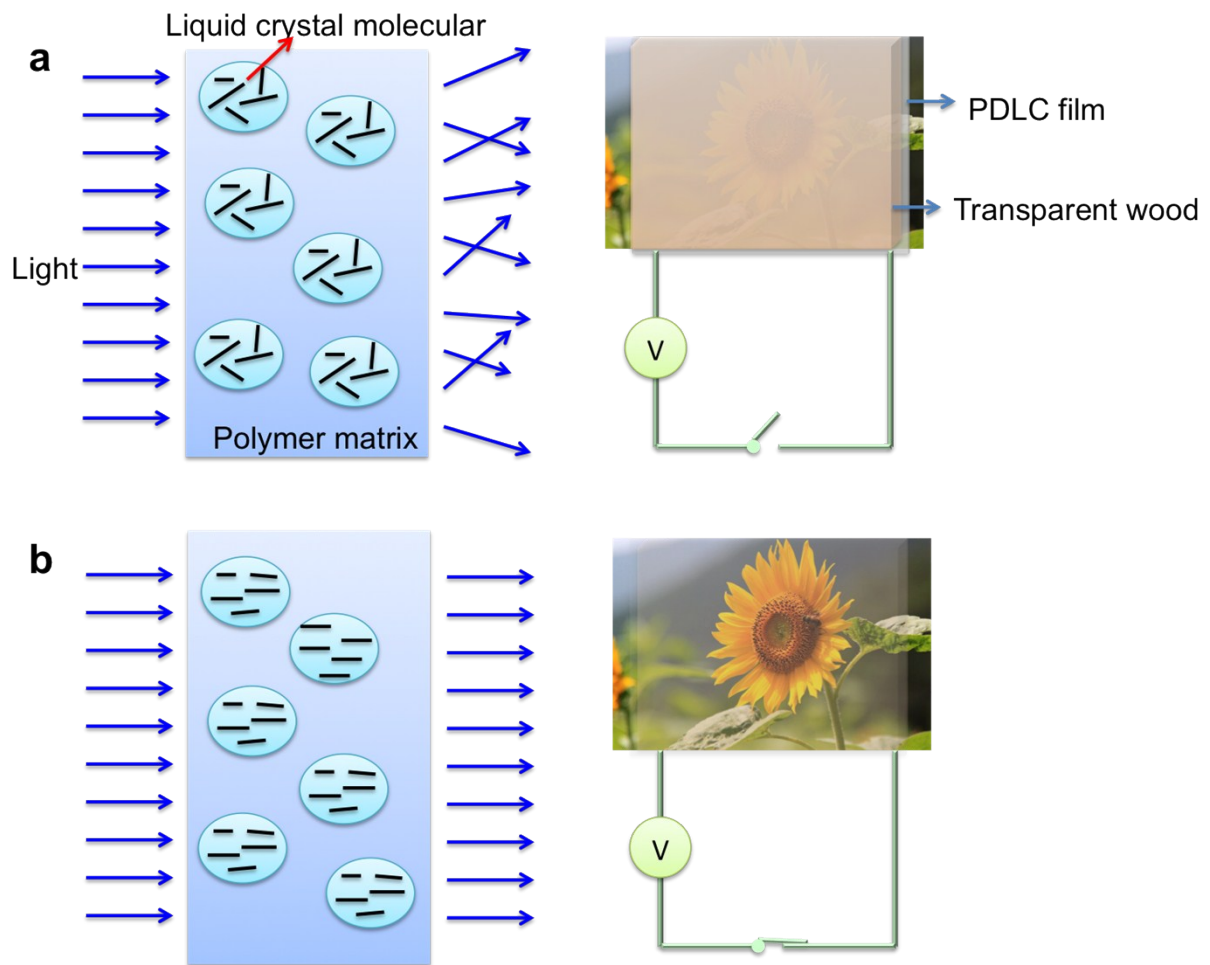

Figure S2 Schematic showing the working mechanism of the smart window.
